# Supplementary material
Source: publisher figshare collection journal article supplement (https://tandf.figshare.com/ndownloader/files/16131284)
Supplement: Supplementary file 1 [file 16131284]

## Sheet: Grouping of foods 2011-2016
	Table S1
	Grouping of food/tap water and numbers of samples within Slovenian official control/monitoring in 2011−2016.
			Year − Pb							Year − Cd
	Food category	Food samples	2011	2012	2013	2014	2015	2016		2011	2012	2013	2014	2015	2016
	Grain and grain products	wheat (grains and flour), barley (grains, grains for human consumption), rye (grains), oat (grains and flakes), maize (grains and grains for human consumption), different processed rice grains for human consumption, buckwheat (grains, flour, porridge), millet (grains, flour, porridge), other cereals	74	84	81	31	20	46		70	123	81	31	20	46
	Vegetables and vegetable products	root vegetables (carrots, celeriac, parsley root, radishes, turnips), bulb vegetables (onions, garlic, shallots, spring onions), fruiting vegetables (tomatoes, egg plants, cucumbers, courgettes), brassica vegetables (broccoli, cauliflower, chinese cabbage, head cabbage, kale, kohlrabi), leaf vegetables (chard, endive, iceberg-type lettuce, lamb's lettuce, rucola, spinach, witloof chicory), legume…	252	128	120	196	143	140		238	138	120	196	144	140
	Starchy roots and tubers	potatoes, new potatoes, sweet potatoes	67	71	83	40	25	29		68	71	83	40	25	29
	Legumes, nuts and oilseeds	peas without pods, soya beans, chick peas, lentils, seeds (linseed, sesame, pumpkin, poppy)	0	20	30	0	13	3		0	45	30	0	13	3
	Fruit and fruit products	apples, pears, table grapes, strawberries, blueberries, raspberries, avocados, bananas, dried dates	127	0	18	6	10	55		100	0	18	6	10	55
	Meat and edible offal	livestock meat (beef, pork, small ruminants, horse), chicken meat, game mammals meat (not specified), edible offal of farmed animals (kidneys of beef, small ruminants, equidaes, pig and chicken; livers of beef, pork and veal)	132	133	30	35	29	40		132	133	30	35	30	40
	Fish and other seafood	marine and freshwater fish, fresh or frozen, farmed or wild (tuna, sea bass, bream, sardines, cod, salmon, trout), water molluscs (cuttlefish, squid, bivalve molluscs, octopus), crustaceans (crabs, shrimps)	5	5	35	5	25	21		5	5	55	25	25	21
	Milk and dairy products	milk (fresh, pasteurized, sterilized)	12	12	0	10	9	0		12	12	0	0	0	0
	Sugar and confectionary	different chocolates, honey (Pb analysed only in honey)	8	8	0	0	0	0		8	28	0	0	0	0
	Animal and vegetable fats and oils	vegetable oils - (pumpkin seed, soybean, sunflower, vegetable oil, olives for oil production)	35	0	0	0	0	0		0	0	0	0	0	0
	Fruit and vegetable juices	apple juices and nectars, orange juices and nectars, tomato juices, grapefruit juices	0	0	14	22	11	1		0	0	0	0	0	0
	Alcoholic beverages	white wine, red wine, sparkling wine	0	0	0	2	16	0		0	0	0	0	0	0
	Drinking water	tap water	408	359	366	419	457	482		408	359	366	419	457	482
	Herbs, spices and condiments	celery leaves, parsley herb, ginger, pepper, cinnamon	5	41	0	0	8	1		5	41	0	0	8	1
	Foods for infants and small children	infant formulae and follow-on formulae in powder, cereal-based food, ready to eat meals for infants and small children	59	13	30	18	16	22		60	13	30	18	16	22
	Products for special nutritional use	dietary supplements (vitamin supplements, mineral supplements, vitamins and mineral combination supplements, fatty acid supplements, plant extract formulas, algae formulas, protein and amino acids supplements, pollen based supplement, other supplements)	65	50	38	31	30	31		65	49	38	31	30	31
		Sum	1249	924	845	815	812	871		1171	1017	851	801	778	870
		Sum of foods without water	841	565	479	396	355	389		763	658	485	382	321	388
